# Supplementary material for: Public awareness of sepsis is still poor: we need to do more
Source: Springer Nature journal article supplement (doi:10.1007/s00134-018-5307-5), 2018-07-19
Supplement: MOESM1 [file 15963860]

**SUPPLEMENTARY REFERENCES**

1. Phua J, et al. Public awareness of sepsis and stroke in Singapore: a population-based survey. Ann Acad Med Singapore. 2013 Jun;42(6):269-77.
2. Reinhart K, et al. Recognizing Sepsis as a Global Health Priority — A WHO Resolution. N Engl J Med 2017; 377:414-417
3. Mellhammar L, et al. Public Awareness of Sepsis Is Low in Sweden. Open Forum Infect Dis 2015 Dec; 2(4): ofv161.
4. Park M et al. Awareness and knowledge of sepsis in the general Korean population: comparison with the awareness and knowledge of acute myocardial infarction and stroke. Clin Exp Emerg Med 2014; 1(1): 41-48.
5. Rubulotta FM, et al. An international survey: Public awareness and perception of sepsis. Crit Care Med. 2009 Jan;37(1):167-70.
